1                    **FCHSD2 Controls Oncogenic ERK1/2 Signaling Outcome by**

2                                    **Regulating Endocytic Trafficking**

3

4    **Guan-Yu Xiao<sup>1</sup> and Sandra L. Schmid<sup>1</sup>**

5    <sup>1</sup>Department of Cell Biology, University of Texas Southwestern Medical Center, Dallas, TX

6    75390

7

8    **Running Title: FCHSD2 controls RTK trafficking and signaling**

9

10    **Disclosure of Potential Conflicts of Interest**

11    No potential conflicts of interest were disclosed.

12

13    **Total Character Count (excluding references): 43,033**

14

15

16 **Abstract**

17 Cancer progression is driven, in part, by altered signaling downstream of receptor tyrosine  
18 kinases (RTKs). Surface expression and RTK activity are regulated by clathrin-mediated  
19 endocytosis (CME), endosomal recycling or degradation. In turn, oncogenic signaling  
20 downstream of RTKs can reciprocally regulate endocytic trafficking, creating feedback loops  
21 that enhance tumor progression. We previously reported a cancer-cell specific function of  
22 FCHSD2 (FCH/F-BAR and double SH3 domain-containing protein) in regulating CME in non-  
23 small-cell lung cancer (NSCLC) cells. Here, we report that FCHSD2 loss impacts recycling of  
24 EGFR and MET, diverting their trafficking toward late endosomes and lysosomes. FCHSD2  
25 depletion results in the nuclear translocation of active ERK1/2, leading to enhanced transcription  
26 and upregulation of EGFR and MET. The small GTPase, Rab7, is essential for the FCHSD2  
27 depletion-induced effects. Correspondingly, FCHSD2 loss correlates with higher tumor grades of  
28 NSCLC. Clinically, NSCLC patients expressing high FCHSD2 exhibit elevated survival,  
29 whereas patients with high Rab7 expression display decreased survival rates. Our study provides  
30 new insight into the molecular nexus for crosstalk between oncogenic signaling and RTK  
31 trafficking that controls cancer progression.

32

## 33 **Introduction**

34 Non-small-cell lung cancer (NSCLC) is the major world-wide cause of death from cancer  
35 ([Siegel, Miller et al., 2019](#)). Transformed NSCLC cells surreptitiously multiply while  
36 undergoing generations of selected evolution to acquire the characteristics of an aggressive and  
37 metastatic tumor, in part driven by altered signaling, which is associated with activation of  
38 receptor tyrosine kinases (RTKs) ([Bacac & Stamenkovic, 2008](#), [Gower, Wang et al., 2014](#),  
39 [Hanahan & Weinberg, 2011](#)). The expression and activity of cell surface RTKs, in turn, is  
40 regulated predominantly through clathrin-mediated endocytosis (CME) ([Conner & Schmid,](#)  
41 [2003](#), [Gonnord, Blouin et al., 2012](#), [McMahon & Boucrot, 2011](#)), endosomal recycling or  
42 degradation ([Mellman & Yarden, 2013](#), [Paul, Jacquemet et al., 2015](#), [Sigismund, Confalonieri et](#)  
43 [al., 2012](#)). Hence, a link between endocytic trafficking and cancer progression has been  
44 suggested ([Lanzetti & Di Fiore, 2008](#), [Mellman & Yarden, 2013](#), [Mosesson, Mills et al., 2008](#)).  
45 Yet, few studies have focused on cancer cell specific alterations in endocytic trafficking.

46 CME is the major endocytic pathway that determines the rates of internalization of  
47 plasma membrane receptors, regulates their expression on the cell surface, and controls their  
48 downstream signaling activities ([Conner & Schmid, 2003](#), [Gonnord et al., 2012](#), [McMahon &](#)  
49 [Boucrot, 2011](#)). We previously discovered that oncogenic signaling downstream of surface  
50 RTKs can, in turn regulate CME and early recycling pathways by creating feedback loops that  
51 influence signaling, migration and metastasis in NSCLC cells ([Chen, Bendris et al., 2017](#),  
52 [Schmid, 2017](#), [Xiao, Mohanakrishnan et al., 2018](#)). Moreover, some of these mechanisms for  
53 reciprocal crosstalk between signaling and the endocytic trafficking pathway appear to be  
54 specific for, or co-opted by cancer cells to enhance tumor progression ([Schmid, 2017](#), [Xiao et al.,](#)  
55 [2018](#)). We have termed these cancer-specific changes in the endocytic machinery ‘adaptive’

56 endocytic trafficking and hypothesize that these ‘gain-of-function’ changes in endocytic  
57 trafficking contribute to cancer progression and metastasis ([Schmid, 2017](#)).

58         The mechanisms that control the crosstalk between cargo (especially signaling receptors)  
59 and the endocytic machinery and their roles in cancer have not been explored. We recently  
60 discovered that the cancer-specific activation of FCHSD2 (FCH/F-BAR and double SH3  
61 domain-containing protein) downstream of ERK1/2 contributes to adaptive CME in NSCLC  
62 cells ([Xiao et al., 2018](#)), in this case by suppressing EGFR signaling. Similarly, its *Drosophila*  
63 ortholog, Nervous Wreck (*Nwk*) suppresses BMP signaling, but by regulating endosomal  
64 recycling at the synapse ([Rodal, Blunk et al., 2011](#)). Accordingly, it is now critical to determine  
65 whether FCHSD2 also functions in endosomal trafficking of RTKs to regulate their oncogenic  
66 signaling from endosomes and whether this effects human tumor progression.

67         To address this issue, we used HCC4017 and H1975 NSCLC cells, which exhibit  
68 oncogenic signaling pathways downstream of Kirsten Ras ( $KRas^{G12C}$ ) or  $EGFR^{T790M/L858R}$   
69 mutations, respectively. Here, we measured the effects of FCHSD2 depletion on the endocytic  
70 recycling and trafficking of the RTKs, EGFR and MET, and the consequences of these  
71 alterations on downstream signals. We demonstrated that FCHSD2 functions as a switch to  
72 regulate the trafficking pathway and destination of the RTKs through negative regulation of the  
73 small GTPase, Rab7. FCHSD2-dependent RTK trafficking controls the nuclear translocation of  
74 ERK1/2 signaling and expression of the RTKs. Our study provides a novel mechanism of action  
75 by which protein traffic between endosomal compartments controls the outcome of ERK1/2  
76 signaling and to affect NSCLC progression.

77

## 78 **Results**

### 79 **FCHSD2 regulates endosomal trafficking of TfnR and EGFR in NSCLC cells**

80 To test whether FCHSD2, like its *Drosophila* homologue also functions in endosomal  
81 trafficking, we first assessed recycling of transferrin receptor (TfnR), a canonical marker for the  
82 quantification of endosomal trafficking ([Harding, Heuser et al., 1983](#)). To further determine  
83 which step(s) are affected, we measured TfnR recycling directly from early endosomes,  
84 following a 10 min pulse of internalized ligand or through perinuclear recycling endosomes  
85 following a 30 min pulse ([Maxfield & McGraw, 2004](#)). FCHSD2 knockdown (KD) by siRNA  
86 selectively inhibits slower recycling of TfnR, presumably via recycling endosomes (Fig. 1A and  
87 B). However, unlike the cancer cell-specific role of FCHSD2 in regulating CME downstream of  
88 ERK1/2 ([Xiao et al., 2018](#)), its function in endosomal recycling was neither dependent on  
89 ERK1/2 activity nor cancer cell-specific (EV Fig. 1).

90 FCHSD2 KD also reduced the efficiency of EGFR recycling (Fig. 1C; EV Fig. 2A and  
91 2B). To further explore which stage in the process was disrupted, we followed p-EGFR  
92 trafficking using immunofluorescence and detected the accumulation of active EGFR in  
93 LAMP1-positive late endosome/lysosomes upon FCHSD2 KD (Fig. 1D and E; EV Fig. 2C and  
94 2D). In accordance with these results, FCHSD2 depletion enhanced the rate of EGFR  
95 degradation following EGF stimulation (Fig. 1F and G). These findings reveal additional roles  
96 for FCHSD2 in endocytic recycling and in controlling EGFR trafficking and degradation.

97

### 98 **FCHSD2 directs the endocytic trafficking of MET receptor in NSCLC cells**

99 We have shown that FCHSD2 regulates endocytosis of TfnR and EGFR and that it  
100 negatively regulates EGFR signaling from the cell surface ([Xiao et al., 2018](#)). Less studied, but

101 also highly associated with NSCLC progression is the RTK, MET and its ligand HGF  
102 (hepatocyte growth factor). Moreover, it has been established that MET signaling requires  
103 endocytosis ([Barrow-McGee & Kermorgant, 2014](#), [Joffre, Barrow et al., 2011](#)) and that it  
104 differentially signals from early vs. late endosomes ([Menard, Parker et al., 2014](#)). Given the role  
105 of FCHSD2 in endosomal recycling, we speculate that FCHSD2 also functions in regulating the  
106 endocytic trafficking of MET. To test this hypothesis, we performed immunofluorescence to  
107 measure MET trafficking after HGF stimulation, using antibodies against MET, as well as  
108 different endosomal proteins (i.e. EEA1, Rab11 and LAMP1 that mark, respectively, early  
109 endosomes, recycling endosomes and late endosomes/lysosomes) (EV Fig. 3 and Fig. 4).

110 Loss of FCHSD2 resulted in the accumulation of MET in early and late endosomes, with  
111 a corresponding decrease in colocalization with recycling endosomes (Fig. 2A). Additionally,  
112 FCHSD2 KD increased MET degradation following HGF stimulation (Fig. 2B and C). These  
113 data demonstrate that FCHSD2 also regulates trafficking and degradation of MET.

114

### 115 **FCHSD2 KD-induced upregulation of RTKs is independent of their activities**

116 Paradoxically, we also noted that despite decreased recycling and enhanced degradation  
117 of the RTKs following FCHSD2 KD, the steady-state levels of EGFR and MET were higher in  
118 the FCHSD2 deficient cells (Fig. 1F and Fig. 2B). Unexpectedly, FCHSD2 KD resulted in  
119 increased levels of both *EGFR* and *MET* mRNA (Fig. 3A), consistent with the increased  
120 expression seen at the protein level.

121 According to previous studies, the transfer of active RTKs to perinuclear endosomes  
122 triggers the juxtannuclear activation of a weak STAT3 signal that leads to the required threshold  
123 of phosphorylation for nuclear translocation ([Kermorgant & Parker, 2008](#), [Miaczynska, 2013](#)). In

124 turn, accumulation of nuclear p-STAT3 promotes the transcription of *HGF* and *c-Fos* ([Carpenter](#)  
125 [& Lo, 2014](#)), leading to upregulation of EGFR ([Johnson, Murphy et al., 2000](#)) and MET  
126 ([Anastasi, Giordano et al., 1997](#), [Boccaccio & Comoglio, 2006](#)). To test whether this signaling  
127 pathway accounted for our findings, we treated cells with an EGFR inhibitor (afatinib) or a MET  
128 inhibitor (crizotinib). However, neither inhibition affected the upregulation of RTKs in the  
129 FCHSD2 depleted cells (Fig. 3B and C; EV Fig. 5). Moreover, FCHSD2 KD decreased the level  
130 of p-STAT3 (Fig. 3D) and was unable to trigger the transcription of STAT3 target genes, *HGF*  
131 and *c-Fos* (Fig. 3E).

132

### 133 **ERK1/2 activity is responsible for the FCHSD2 KD-induced RTK upregulation**

134 Having ruled out STAT3 signaling and indeed, activities of the RTKs themselves, we  
135 next looked for alterations in steady-state activity of other signaling pathways that might account  
136 for the upregulation of ERK and MET upon FCHSD2 KD. We observed that FCHSD2 depletion  
137 specifically increased ERK1/2 activity, but not Akt activity even at steady-state in HCC4017  
138 cells (Fig. 4A and B). Notably, FCHSD2 KD significantly increased the expression of c-Jun and  
139 p-c-Jun, although the ratio of p-c-Jun/c-Jun was unaffected (Fig. 4A-C). Constitutive activation  
140 of ERK1/2 signaling induces *c-Jun* transcription and sustains c-Jun stability and activity ([Lopez-](#)  
141 [Bergami, Huang et al., 2007](#)); correspondingly, FCHSD2 KD enhanced the transcription of *c-Jun*  
142 mRNA (Fig. 4C). Further, loss of FCHSD2 specifically increased ERK1/2 activity in the  
143 nucleus, while the ratio of pERK/ERK in the cytoplasm remained unchanged (Fig. 4D and E). In  
144 addition to enhancing c-Jun expression, the accumulation of nuclear p-ERK1/2 in FCHSD2-  
145 depleted cells promoted activity of the ERK1/2 target, ETS1 ([Plotnikov, Zehorai et al., 2011](#))  
146 (Fig. 4D and E). Both c-Jun and ETS1 are known transcription factors for *EGFR* ([Johnson et al.,](#)

147 [2000](#)) and *MET* ([Boccaccio & Comoglio, 2006](#), [Gambarotta, Boccaccio et al., 1996](#)), accounting  
148 for the observed increase in transcription of *EGFR* and *MET* mRNA after FCHSD2 KD (Fig.  
149 3A).

150 To directly test whether ERK1/2 activity is required for increased expression of the RTKs  
151 in FCHSD2 KD cells, we used an ERK1/2 kinase inhibitor (SCH772984) and an inhibitor  
152 targeting the essential upstream kinase, MEK1/2 (GSK1120212). As predicted, both ERK1/2 and  
153 MEK1/2 inhibition disrupted the upregulation of EGFR and MET receptor in HCC4017 and  
154 H1975 cells (Fig. 4F and G). Together, these results suggest that increased ERK1/2 activity in  
155 the nucleus is essential for the effects of FCHSD2 depletion in NSCLC cells.

156

#### 157 **Rab7 is essential for the effects of FCHSD2 KD on RTK expression**

158 Previous studies have shown that translocation of active ERK1/2 to the nucleus requires  
159 the recruitment of MEK1 to Rab7-positive endosomes, where MEK1 activates ERK1/2 signaling  
160 from late/perinuclear endosome compartments ([Nada, Hondo et al., 2009](#)). In addition, Rab7  
161 supports endosome maturation and promotes endocytic trafficking toward late endosomes rather  
162 than to recycling endosome compartments ([Langemeyer, Frohlich et al., 2018](#)). In agreement  
163 with previous research, Rab7 KD increased the rate of recycling of TfnR and EGFR (Fig. 5A).  
164 Strikingly, there was no difference between the effects of Rab7 KD alone and the depletion of  
165 both FCHSD2 and Rab7 on the TfnR and EGFR recycling (Fig. 5A), indicating that the  
166 FCHSD2 KD-induced phenotype depends on the function of Rab7. Given that the activities of  
167 MEK1/2 and ERK1/2 are necessary for the effects of FCHSD2 KD, we further tested the  
168 consequences of Rab7 depletion in the cells. Importantly, Rab7 KD abolished the upregulation of  
169 EGFR and MET induced by FCHSD2 depletion (Fig. 5B).



170 Rab7 is a small GTPase, whose function is determined by its expression and activity,  
171 regulated by a switch between active GTP-bound (Rab7·GTP) and inactive GDP-bound  
172 (Rab7·GDP) states ([Langemeyer et al., 2018](#)). To assess the effect of FCHSD2 KD on Rab7  
173 activity, we immunoprecipitated active Rab7 using an antibody specifically recognizing the  
174 Rab7·GTP in cancer cells. We found that there were higher levels of active Rab7 in the  
175 FCHSD2-deficient cells (Fig. 5C). These data suggest that FCHSD2 controls expression and  
176 trafficking of the RTKs by negatively regulating Rab7. Thus, FCHSD2 and Rab7 play  
177 antagonistic roles in regulating endosomal trafficking.

178

### 179 **FCHSD2 and Rab7 differentially effect lung cancer progression**

180 Our studies have revealed a multifaceted function for FCHSD2 in the crosstalk between  
181 endocytic trafficking and oncogenic signaling in NSCLC cells (Fig. 6A). We previously showed  
182 that FCHSD2 has a cancer cell-specific function in positively regulating CME downstream of  
183 ERK1/2 activity. Here we show that FCHSD2 plays a general role in regulating endosomal  
184 trafficking through adversely modulating Rab7 activity. Together these activities establish  
185 FCHSD2 as a key regulator in oncogenic ERK1/2 signaling outcome by controlling the  
186 trafficking and expression of EGFR and MET. Given that FCHSD2 KD dramatically increased  
187 the proliferation and the migration activities of NSCLC cells ([Xiao et al., 2018](#)), FCHSD2 may  
188 function as a negative regulator for human lung tumor growth. In contrast, Rab7 is thought to  
189 favor lung cancer progression.

190 To investigate the correlation between FCHSD2 activity and lung tumor progression, we  
191 directly measured the protein expression level of FCHSD2 in tumor tissues from lung

192 adenocarcinoma patients. As expected from our previous *in vitro* findings, FCHSD2 expression  
193 is gradually decreased in higher grades of lung adenocarcinoma tumors (Fig. 6B).

194 Finally, we examined the relationship between FCHSD2 and Rab7 and NSCLC patient  
195 survival by mining clinical data. Patients with relatively high FCHSD2 expression had  
196 significantly better survival rates than those in the low-expression group (Fig. 6C). In contrast,  
197 Rab7 expression had the opposite correlation with patient survival rates (Fig. 6C). Notably, the  
198 correlation between the expression of FCHSD2 or Rab7 with survival rates was more prominent  
199 in lung adenocarcinoma patients (Fig. 6C). These findings suggest that FCHSD2 functions as a  
200 negative regulator of Rab7 and controls lung cancer aggressiveness.

201

## 202 **Discussion**

203 Endocytic trafficking regulates the expression and activity of RTKs and modulates their  
204 downstream signaling to maintain cell homeostasis ([Antonescu, McGraw et al., 2014](#)). We  
205 previously reported that activation of FCHSD2 by ERK1/2 phosphorylation increases the rate of  
206 TfnR and EGFR internalization by CME and suppresses signaling from cell surface EGFRs,  
207 specifically in cancer cells ([Xiao et al., 2018](#)). Here we show that FCHSD2, like its *Drosophila*  
208 orthologue *Nwk* ([Rodal et al., 2011](#)) also enhances recycling of internalized RTKs and reduces  
209 their trafficking to late endosomes/lysosomes. This activity is independent of ERK activation and  
210 involves the negative regulation of Rab7. Together these FCHSD2-dependent changes enhance  
211 the rate of trafficking of RTKs through the early and recycling endocytic pathways. As a result,  
212 their signaling pathways, in particular those downstream of ERK1/2 nuclear signaling, are  
213 suppressed resulting in decreased proliferation and reduced cell migration. Our mechanistic  
214 studies of FCSHD2 function in NSCLC cell lines were consistent with clinical databases

215 showing that high levels of FCHSD2 expression correlate with improved survival rates,  
216 especially among lung adenocarcinoma patients, whose cancers are frequently driven by  
217 oncogenic mutations that activate MAP kinase signaling ([Dogan, Shen et al., 2012](#), [Ferrer,](#)  
218 [Zugazagoitia et al., 2018](#)). Together, these data suggest that the regulation of early endocytic  
219 trafficking by FCHSD2 functions to suppress signaling downstream of activated RTKs  
220 potentially as a means to maintain cell homeostasis.

221 Overexpressed RTKs are a common feature among different types of cancers and widely  
222 considered favorable for tumor progression ([Maegawa, Arao et al., 2009](#)). In particular, MET,  
223 the HGF receptor, is upregulated in ~50% of NSCLC, particularly in lung adenocarcinomas  
224 (72.3%) ([Ichimura, Maeshima et al., 1996](#)). Hyperactivity of MET and its dependent invasive  
225 growth signals is a general feature of highly aggressive tumors and associated with poor survival  
226 ([Comoglio, Giordano et al., 2008](#)). Moreover, the activation of MET and its downstream  
227 signaling is dependent on trafficking through both early and late endosomes ([Joffre et al., 2011](#),  
228 [Trusolino, Bertotti et al., 2010](#)). FCHSD2 depletion resulted in both increased expression of  
229 MET and decreased recycling leading to the accumulation of MET in both early and late  
230 endosome/lysosomes compartments. These FCHSD2-dependent changes in MET expression and  
231 trafficking, are consistent with our immunohistochemistry studies showing that FCHSD2  
232 expression levels inversely correlated with more advanced stages of lung adenocarcinomas.

233 FCHSD2 KD led to increased steady-state expression levels of the oncogenes MET,  
234 EGFR and c-Jun, as well as an increase in the steady-state activation of ERK1/2 specifically in  
235 the nucleus. Paradoxically, these changes were not dependent on either MET or EGFR kinase  
236 activities, but required ERK1/2 activity. A previous study showed that KRas can be  
237 constitutively internalized via CME and activated on Rab7-positive late endosomes ([Lu, Tebar et](#)

238 [al., 2009](#)). There the late endosome-associated adaptor p14 and the scaffolding protein MP1  
239 tether MEK and ERK1/2 for downstream activation of ERK1/2 ([Wunderlich, Fialka et al., 2001](#)).  
240 We speculate that, even if inactive, the high local concentrations of EGFR and MET that  
241 accumulate on late endosomes after FCHSD2 KD may be sufficient to recruit mSOS and activate  
242 KRas. Interestingly, basal Ras activation has also been reported in Neimann-Pick C fibroblasts  
243 where late endosomal trafficking is perturbed ([Corey & Kelley, 2007](#)).

244 Rab7 is a ubiquitously expressed member of the Rab family of small GTPases localized  
245 to late endosomal compartments and plays a vital role in endosomal membrane traffic ([Guerra &  
246 Bucci, 2016](#)). Specifically, Rab7 mediates the maturation of early endosomes into late  
247 endosomes, fusion of late endosomes with lysosomes in the perinuclear region and lysosomal  
248 biogenesis ([Langemeyer et al., 2018](#)). Here we show that the effects of FCHSD2 KD on  
249 endosomal trafficking and consequent upregulation of EGFR and MET expression are dependent  
250 on Rab7 and that FCHSD2 appears to negatively regulate Rab7 activation. These findings show  
251 that Rab7 and FCHSD2 functions in endosomal trafficking are antagonistic. Consistent with this,  
252 we report here that the expression of Rab7 is negatively correlated with NSCLC patient survival,  
253 which is opposite to the positive correlation between FCHSD2 expression and patient survival,  
254 especially in lung adenocarcinomas. That these two proteins converge on regulating trafficking  
255 between early endosomes, recycling endosomes and late endosomes suggests an important role  
256 for endosomal trafficking in regulating signaling in cancer cells and tumor progression.

257 Collectively, our findings define an endocytic trafficking pathway regulated by FCHSD2  
258 and Rab7 that functions to control RTK expression, oncogenic signal transduction and NSCLC  
259 progression. Knowledge of these trafficking pathways and their (dys)regulation during cancer

260 progression could help to identify potential new therapeutic targets for the prevention of  
261 aggressive cancers and/or prognostic indicators that can guide lung cancer treatment.

262

263

## 264 **Material and Methods**

### 265 **Cell culture and chemicals**

266 HCC4017 (KRas<sup>G12C</sup>, EGFR<sup>WT</sup>) and H1975 (KRas<sup>WT</sup>, EGFR<sup>T790M/L858R</sup>) NSCLC cells  
267 (from John Minna, UT Southwestern Medical Center, Dallas) were grown in RPMI 1640  
268 (Thermo Fisher Scientific) supplemented with 10% (vol/vol) FCS (HyClone). ARPE-19 cells  
269 (from ATCC) were cultivated in DMEM/F12 (Thermo Fisher Scientific) supplemented with 10%  
270 (vol/vol) FCS. The recombinant human EGF used in this study was from Thermo Fisher  
271 Scientific and the recombinant human HGF was generously provided by Drs. Emiko Uchikawa  
272 and Xiaochen Bai (UT Southwestern Medical Center, Dallas). The cycloheximide was from  
273 MilliporeSigma. The EGFR inhibitor Afatinib, the MET inhibitor Crizotinib and the ERK  
274 inhibitor SCH772984 were from Selleck Chemicals. The MEK inhibitor GSK1120212 was from  
275 MedChemExpress.

276

### 277 **RNA interference**

278 Cells were treated with the siRNA pool targeting FCHSD2 (#J-021240-10, J-021240-11,  
279 J-021240-12, Dharmacon) or Rab7 (LU-010388-00, Dharmacon) using RNAiMAX (Thermo  
280 Fisher Scientific) to silence the endogenous protein. Briefly, 50 nM of the indicated siRNA pool  
281 and 6.5 µl of RNAiMAX reagent were added in 1 ml of OptiMEM (Thermo Fisher Scientific) to  
282 each well of a 6-well plate and incubated for 20 min at room temperature. Cells were  
283 resuspended in 1 ml of culture medium, seeded in each well of a 6-well plate at 20-30%  
284 confluency containing the mixed siRNA-lipid complex and incubated for 48-72 h, followed by

285 experiments. The AllStars Negative siRNA non-targeting sequence was purchased from Qiagen  
286 (#SI03650318).

287

## 288 **Western blotting and analyses**

289 Cells cultured in each well of a 6-well plate at 80% confluency were washed three times  
290 with PBS and harvested/resuspended in 150–200  $\mu$ l of 2 $\times$  Laemmli buffer (Bio-Rad). The cell  
291 lysate was boiled for 10 min and loaded onto an SDS gel. After transferring to a nitrocellulose  
292 membrane (Bio-Rad), membranes were blocked with 5% milk in TBST buffer and were probed  
293 with antibodies diluted in 5% BSA in TBST buffer against the following proteins: FCHSD2  
294 (#PA5-58432, 1:500, Thermo Fisher Scientific), Rab11 (#5589S, 1:1000, Cell Signaling), Rab7  
295 (#9367S, 1:1000, Cell Signaling), p-EGFR Y1068 (#3777S, 1:1000, Cell Signaling), EGFR  
296 (#4267S, 1:1000, Cell Signaling), p-MET Y1234/1235 (#3077S, 1:1000, Cell Signaling), MET  
297 (#8198S, 1:1000, Cell Signaling), p-Akt S473 (#4060L, 1:1000, Cell Signaling), Akt (#9272S,  
298 1:1000, Cell Signaling), p-ERK1/2 T202/Y204 (#4370S, 1:1000, Cell Signaling), ERK1/2  
299 (#4695S, 1:1000, Cell Signaling), p-STAT3 Y705 (#4370S, 1:1000, Cell Signaling), STAT3  
300 (#9139S, 1:1000, Cell Signaling), p-c-Jun S63 (#9261S, 1:1000, Cell Signaling), c-Jun (#9165S,  
301 1:1000, Cell Signaling), p-ETS1 T38 (#ab59179, 1:1000, Abcam), ETS1 (#14069S, 1:1000, Cell  
302 Signaling),  $\beta$ -Actin (#sc-47778, 1:2500, Santa Cruz), Histone-H3 (#4499S, 1:2000, Cell  
303 Signaling) and Vinculin (#V9131, 1:1000, MilliporeSigma). Horseradish peroxidase (HRP)-  
304 conjugated secondary antibodies (#G21234 and # G21040, 1:2000, Thermo Fisher Scientific)  
305 were used according to the manufacturers' instructions. Quantitative analysis was performed by  
306 using ImageJ software (NIH).

307 For EGF- or HGF-induced degradation of EGFR or MET receptors, after siRNA  
308 transfection, the cells ( $5 \times 10^5$ ) were seeded in each well of a 6-well plate containing RPMI 1640  
309 with 10% FCS. Eight hours after seeding, cells were washed three times with PBS and starved in  
310 RPMI 1640 without FCS for 16 h. The cells then were untreated or treated with 100 ng/ml of  
311 EGF or HGF in the presence of cycloheximide (40  $\mu\text{g/ml}$ ) for the indicated times. After the  
312 stimulation, cells were washed three times with PBS and harvested/resuspended in 150–200  $\mu\text{l}$  of  
313  $2 \times$  Laemmli buffer, and the cell lysates were subjected to Western blotting and image analysis as  
314 described above.

315

### 316 **Endocytic recycling assay**

317 TfnR recycling assays were performed using biotinylated Tfn, which was conjugated at a  
318 7:1 molar ratio with the cleavable EZ-Link Sulfo-NHS-SS-Biotin (#A39258, Thermo Fisher  
319 Scientific) according to manufacturer's instructions. For EGFR recycling, non-cleavable  
320 biotinylated EGF (#E3477, Thermo Fisher Scientific) was used for assays. TfnR and EGFR  
321 recycling assays were performed as previously described ([Chen et al., 2017](#)). In brief, cells were  
322 grown overnight in gelatin-coated 96-well plates at a density of  $3 \times 10^4$  cells/well and incubated  
323 with 10  $\mu\text{g/ml}$  biotinylated Tfn or 20 ng/ml biotinylated EGF in assay buffer (PBS<sup>4+</sup>: PBS  
324 supplemented with 1 mM MgCl<sub>2</sub>, 1 mM CaCl<sub>2</sub>, 5 mM glucose and 0.2% bovine serum albumin)  
325 for the 10 or 30 min pulse at 37°C. Cells were then immediately cooled down (4°C) to stop  
326 internalization. The remaining surface-bound biotinylated Tfn was cleaved by incubation with 10  
327 mM Tris (2-carboxyethyl) phosphine (TCEP) in assay buffer for 30 min at 4°C. The surface-  
328 bound biotinylated EGF was removed by acid wash (0.2 M acetic acid, 0.2 M NaCl, pH 2.5) at  
329 4°C. For TfnR recycling assays using ERK1/2 inhibitors (SCH772984), cells were incubated in



330 the absence or presence of 10  $\mu$ M of SCH772984 in the assay buffer containing 10 mM TCEP  
331 for 30 min at 4°C before recycling assays were performed in the continued absence or presence  
332 of the inhibitor. Cells were washed with cold PBS<sup>4+</sup> buffer and then incubated in PBS<sup>4+</sup>  
333 containing 2 mg/ml of holo-Tfn or 100 ng/ml of EGF and 10 mM of TCEP at 37°C for the  
334 indicated times. The recycled biotinylated Tfn or biotinylated EGF was removed from the cells  
335 by the acid wash step. Cells were then washed with cold PBS and then fixed in 4%  
336 paraformaldehyde (PFA) (Electron Microscopy Sciences) in PBS for 30 min and further  
337 permeabilized with 0.1% Triton X-100/PBS for 10 min. Remaining intracellular biotinylated  
338 ligands were assessed by streptavidin-POD (#11089153001, 1:10000, Roche) in Q-PBS, which  
339 contains 0.2% BSA (Equitech-Bio), 0.001% saponin (MilliporeSigma), and 0.01% glycine  
340 (MilliporeSigma). The reaction was further developed with OPD (MilliporeSigma), and then  
341 stopped by addition of 50  $\mu$ l of 5 M of H<sub>2</sub>SO<sub>4</sub>. The absorbance was read at 490 nm (Biotek  
342 Synergy H1 Hybrid Reader). The decrease in intracellular biotinylated ligands (recycling) were  
343 represented as the percentage of the total internal pool of ligand internalized. Well-to-well  
344 variability in cell number was accounted for by normalizing the reading at 490 nm with a BCA  
345 readout at 562 nm.

346

### 347 **Immunofluorescence and confocal microscopy analyses**

348 After siRNA transfection, the cells were washed three times with PBS and then starved in  
349 RPMI 1640 medium without FCS for 30 min at 37°C. Cells were incubated with 20 ng/ml EGF  
350 or 1  $\mu$ g/ml HGF in RPMI 1640 medium for 30 min at 4°C, washed with cold PBS and then  
351 incubated in pre-warmed RPMI 1640 medium at 37°C for the indicated times. Cells were then  
352 washed with ice-cold PBS to stop chase, fixed with 4% (w/v) PFA for 30 min at 37°C and

353 permeabilized using 0.05% saponin (w/v) (MilliporeSigma) for 10 min. Cells were blocked with  
354 Q-PBS and probed with antibodies against the following proteins: p-EGFR Y1068 (#3777S,  
355 1:200, Cell Signaling), MET (#AF276, 1:100, R&D Systems), EEA1 (#610457, 1:100, BD  
356 Biosciences), Rab11 (#5589S, 1:50, Cell Signaling), and LAMP1 (#ab25245, 1:75, Abcam),  
357 according to the manufacturers' instructions. AlexaFluor-conjugated secondary antibodies (#A-  
358 11036, A-11055, A-21206, A-21434, A-31571, Thermo Fisher Scientific) were used according  
359 to the manufacturers' instructions. Fixed cells were mounted in PBS and imaged using a 60×,  
360 1.49 NA APO objective (Nikon) mounted on a Nikon Ti-Eclipse inverted microscope coupled to  
361 an Andor Discovery Spinning disk confocal/Borealis widefield illuminator equipped with an  
362 additional 1.8× tube lens (yielding a final magnification of 108×). The pinhole size was 50 μm.  
363 The percentages of colocalizations were determined using ImageJ software (NIH).

364

### 365 **Nuclear/cytosol fractionation**

366 After siRNA transfection, the cells were subjected to fractionation using the  
367 Nuclear/Cytosol Fractionation Kit (K266-25, BioVision) according to the manufacturer's  
368 instructions.

369

### 370 **Rab7 activation assay**

371 After siRNA transfection, the cells were collected in ice-cold PBS containing protease  
372 and phosphatase inhibitor cocktails (Roche). The cells were used to measure Rab7 activation  
373 using the Rab7 Activation Assay Kit (#NEBB40025, NewEast Biosciences) according to the  
374 manufacturer's instructions.

375

## 376 **Analysis of Kaplan-Meier Survival Data**

377 NSCLC patient survival data was downloaded from the Kaplan Meier plotter database  
378 ([Gyorffy, Surowiak et al., 2013](#)). Analysis of NSCLC patients was performed in FCHSD2 or  
379 Rab7 high and low expression cohort. *P* value was calculated by logrank test ([Gyorffy et al.,  
380 2013](#)).

381

## 382 **Immunohistochemistry and image analyses**

383 The human lung adenocarcinoma tissues were from US Biomax Inc (#LC641) and the  
384 UT Southwestern Tissue Resource, a shared resource at the Simmons Comprehensive Cancer  
385 Center. The tumors were classified according to the American Joint Committee on Cancer  
386 (AJCC) TNM system. The immunohistochemical staining of FCHSD2 (#PA5-58432, Thermo  
387 Fisher Scientific) was optimized and performed by the core facility. The immunohistochemical  
388 images were analyzed using the IHC Profiler, ImageJ software (NIH) as previously described  
389 ([Varghese, Bukhari et al., 2014](#)) to classify the intensities of staining. The immunoreactivity was  
390 determined by H-score, generated by adding the percentage of strong staining (3×), the  
391 percentage of moderate staining (2×) and the percentage of weak staining (1×) samples  
392 ([Goulding, Pinder et al., 1995](#)).

393

394

395 **Authors' Contributions**

396 **Conception and design:** G.Y. Xiao, S. L. Schmid

397 **Development of methodology:** G.Y. Xiao

398 **Acquisition of data (provided animals, acquired and managed patients, provided facilities,**  
399 **etc.):** G.Y. Xiao

400 **Analysis and interpretation of data (e.g., statistical analysis, biostatistics, computational**  
401 **analysis):** G.Y. Xiao

402 **Writing, review, and/or revision of the manuscript:** G.Y. Xiao, S. L. Schmid

403 **Administrative, technical, or material support (i.e., reporting or organizing data,**  
404 **constructing databases):** G.Y. Xiao, S. L. Schmid

405 **Study supervision:** S. L. Schmid

406

407 **Acknowledgments**

408 We thank members of the Schmid lab for critically reading the manuscript, and especially  
409 Marcel Mettlen for his help preparing illustrations. We thank colleagues from Department of  
410 Biophysics: Drs. Emiko Uchikawa and Xiaochen Bai for kindly providing recombinant human  
411 HGF. We acknowledge the UT Southwestern Tissue Resource, a shared resource at the Simmons  
412 Comprehensive Cancer Center (supported in part by the National Cancer Institute under award  
413 number 5P30CA142543) for assistance with immunohistochemistry data analysis and  
414 interpretation. The work was supported by NIH grants R01 GM45455 and GM73165 to SLS.

415

## 416 References

- 417 Anastasi S, Giordano S, Sthandier O, Gambarotta G, Maione R, Comoglio P, Amati P (1997) A natural hepatocyte  
418 growth factor/scatter factor autocrine loop in myoblast cells and the effect of the constitutive Met kinase  
419 activation on myogenic differentiation. *J Cell Biol* 137: 1057-68
- 420 Antonescu CN, McGraw TE, Klip A (2014) Reciprocal regulation of endocytosis and metabolism. *Cold Spring Harb*  
421 *Perspect Biol* 6: a016964
- 422 Bacac M, Stamenkovic I (2008) Metastatic cancer cell. *Annu Rev Pathol* 3: 221-47
- 423 Barrow-McGee R, Kermorgant S (2014) Met endosomal signalling: in the right place, at the right time. *Int J*  
424 *Biochem Cell Biol* 49: 69-74
- 425 Boccaccio C, Comoglio PM (2006) Invasive growth: a MET-driven genetic programme for cancer and stem cells.  
426 *Nat Rev Cancer* 6: 637-45
- 427 Carpenter RL, Lo HW (2014) STAT3 Target Genes Relevant to Human Cancers. *Cancers (Basel)* 6: 897-925
- 428 Chen PH, Bendris N, Hsiao YJ, Reis CR, Mettlen M, Chen HY, Yu SL, Schmid SL (2017) Crosstalk between  
429 CLCb/Dyn1-Mediated Adaptive Clathrin-Mediated Endocytosis and Epidermal Growth Factor Receptor  
430 Signaling Increases Metastasis. *Dev Cell* 40: 278-288
- 431 Comoglio PM, Giordano S, Trusolino L (2008) Drug development of MET inhibitors: targeting oncogene addiction  
432 and expedience. *Nat Rev Drug Discov* 7: 504-16
- 433 Conner SD, Schmid SL (2003) Regulated portals of entry into the cell. *Nature* 422: 37-44
- 434 Corey DA, Kelley TJ (2007) Elevated small GTPase activation influences the cell proliferation signaling control in  
435 Niemann-Pick type C fibroblasts. *Biochim Biophys Acta* 1772: 748-54
- 436 Dogan S, Shen R, Ang DC, Johnson ML, D'Angelo SP, Paik PK, Brzostowski EB, Riely GJ, Kris MG, Zakowski  
437 MF, Ladanyi M (2012) Molecular epidemiology of EGFR and KRAS mutations in 3,026 lung  
438 adenocarcinomas: higher susceptibility of women to smoking-related KRAS-mutant cancers. *Clin Cancer Res*  
439 18: 6169-77
- 440 Ferrer I, Zugazagoitia J, Herberth S, John W, Paz-Ares L, Schmid-Bindert G (2018) KRAS-Mutant non-small cell  
441 lung cancer: From biology to therapy. *Lung Cancer* 124: 53-64
- 442 Gambarotta G, Boccaccio C, Giordano S, Ando M, Stella MC, Comoglio PM (1996) Ets up-regulates MET  
443 transcription. *Oncogene* 13: 1911-7
- 444 Gonnord P, Blouin CM, Lamaze C (2012) Membrane trafficking and signaling: two sides of the same coin. *Semin*  
445 *Cell Dev Biol* 23: 154-64
- 446 Goulding H, Pinder S, Cannon P, Pearson D, Nicholson R, Snead D, Bell J, Elston CW, Robertson JF, Blamey RW,  
447 et al. (1995) A new immunohistochemical antibody for the assessment of estrogen receptor status on routine  
448 formalin-fixed tissue samples. *Hum Pathol* 26: 291-4
- 449 Gower A, Wang Y, Giaccone G (2014) Oncogenic drivers, targeted therapies, and acquired resistance in non-small-  
450 cell lung cancer. *J Mol Med (Berl)* 92: 697-707
- 451 Guerra F, Bucci C (2016) Multiple Roles of the Small GTPase Rab7. *Cells* pii: E34
- 452 Gyorfy B, Surowiak P, Budczies J, Lanczky A (2013) Online survival analysis software to assess the prognostic  
453 value of biomarkers using transcriptomic data in non-small-cell lung cancer. *PLoS One* 8: e82241
- 454 Hanahan D, Weinberg RA (2011) Hallmarks of cancer: the next generation. *Cell* 144: 646-74
- 455 Harding C, Heuser J, Stahl P (1983) Receptor-mediated endocytosis of transferrin and recycling of the transferrin  
456 receptor in rat reticulocytes. *J Cell Biol* 97: 329-39
- 457 Ichimura E, Maeshima A, Nakajima T, Nakamura T (1996) Expression of c-met/HGF receptor in human non-small  
458 cell lung carcinomas in vitro and in vivo and its prognostic significance. *Jpn J Cancer Res* 87: 1063-9
- 459 Joffre C, Barrow R, Menard L, Calleja V, Hart IR, Kermorgant S (2011) A direct role for Met endocytosis in  
460 tumorigenesis. *Nat Cell Biol* 13: 827-37
- 461 Johnson AC, Murphy BA, Matelis CM, Rubinstein Y, Piebenga EC, Akers LM, Neta G, Vinson C, Birrer M (2000)  
462 Activator protein-1 mediates induced but not basal epidermal growth factor receptor gene expression. *Mol Med*  
463 6: 17-27
- 464 Kermorgant S, Parker PJ (2008) Receptor trafficking controls weak signal delivery: a strategy used by c-Met for  
465 STAT3 nuclear accumulation. *J Cell Biol* 182: 855-63
- 466 Langemeyer L, Frohlich F, Ungermann C (2018) Rab GTPase Function in Endosome and Lysosome Biogenesis.  
467 *Trends Cell Biol* 28: 957-970
- 468 Lanzetti L, Di Fiore PP (2008) Endocytosis and cancer: an 'insider' network with dangerous liaisons. *Traffic* 9:  
469 2011-21

- 470 Lopez-Bergami P, Huang C, Goydos JS, Yip D, Bar-Eli M, Herlyn M, Smalley KS, Mahale A, Eroshkin A,  
471 Aaronson S, Ronai Z (2007) Rewired ERK-JNK signaling pathways in melanoma. *Cancer Cell* 11: 447-60
- 472 Lu A, Tebar F, Alvarez-Moya B, Lopez-Alcala C, Calvo M, Enrich C, Agell N, Nakamura T, Matsuda M, Bachs O  
473 (2009) A clathrin-dependent pathway leads to KRas signaling on late endosomes en route to lysosomes. *J Cell*  
474 *Biol* 184: 863-79
- 475 Maegawa M, Arao T, Yokote H, Matsumoto K, Kudo K, Tanaka K, Kaneda H, Fujita Y, Ito F, Nishio K (2009)  
476 EGFR mutation up-regulates EGR1 expression through the ERK pathway. *Anticancer Res* 29: 1111-7
- 477 Maxfield FR, McGraw TE (2004) Endocytic recycling. *Nat Rev Mol Cell Biol* 5: 121-32
- 478 McMahon HT, Boucrot E (2011) Molecular mechanism and physiological functions of clathrin-mediated  
479 endocytosis. *Nat Rev Mol Cell Biol* 12: 517-33
- 480 Mellman I, Yarden Y (2013) Endocytosis and cancer. *Cold Spring Harb Perspect Biol* 5: a016949
- 481 Menard L, Parker PJ, Kermorgant S (2014) Receptor tyrosine kinase c-Met controls the cytoskeleton from different  
482 endosomes via different pathways. *Nat Commun* 5: 3907
- 483 Miaczynska M (2013) Effects of membrane trafficking on signaling by receptor tyrosine kinases. *Cold Spring Harb*  
484 *Perspect Biol* 5: a009035
- 485 Mosesson Y, Mills GB, Yarden Y (2008) Derailed endocytosis: an emerging feature of cancer. *Nat Rev Cancer* 8:  
486 835-50
- 487 Nada S, Hondo A, Kasai A, Koike M, Saito K, Uchiyama Y, Okada M (2009) The novel lipid raft adaptor p18  
488 controls endosome dynamics by anchoring the MEK-ERK pathway to late endosomes. *EMBO J* 28: 477-89
- 489 Paul NR, Jacquemet G, Caswell PT (2015) Endocytic Trafficking of Integrins in Cell Migration. *Curr Biol* 25:  
490 R1092-105
- 491 Plotnikov A, Zehorai E, Procaccia S, Seger R (2011) The MAPK cascades: signaling components, nuclear roles and  
492 mechanisms of nuclear translocation. *Biochim Biophys Acta* 1813: 1619-33
- 493 Rodal AA, Blunk AD, Akbergenova Y, Jorquera RA, Buhl LK, Littleton JT (2011) A presynaptic endosomal  
494 trafficking pathway controls synaptic growth signaling. *J Cell Biol* 193: 201-17
- 495 Schmid SL (2017) Reciprocal regulation of signaling and endocytosis: Implications for the evolving cancer cell. *J*  
496 *Cell Biol*
- 497 Siegel RL, Miller KD, Jemal A (2019) Cancer statistics, 2019. *CA Cancer J Clin* 69: 7-34
- 498 Sigismund S, Confalonieri S, Ciliberto A, Polo S, Scita G, Di Fiore PP (2012) Endocytosis and signaling: cell  
499 logistics shape the eukaryotic cell plan. *Physiol Rev* 92: 273-366
- 500 Trusolino L, Bertotti A, Comoglio PM (2010) MET signalling: principles and functions in development, organ  
501 regeneration and cancer. *Nat Rev Mol Cell Biol* 11: 834-48
- 502 Varghese F, Bukhari AB, Malhotra R, De A (2014) IHC Profiler: an open source plugin for the quantitative  
503 evaluation and automated scoring of immunohistochemistry images of human tissue samples. *PLoS One* 9:  
504 e96801
- 505 Wunderlich W, Fialka I, Teis D, Alpi A, Pfeifer A, Parton RG, Lottspeich F, Huber LA (2001) A novel 14-  
506 kilodalton protein interacts with the mitogen-activated protein kinase scaffold mp1 on a late  
507 endosomal/lysosomal compartment. *J Cell Biol* 152: 765-76
- 508 Xiao GY, Mohanakrishnan A, Schmid SL (2018) Role for ERK1/2-dependent activation of FCHSD2 in cancer cell-  
509 selective regulation of clathrin-mediated endocytosis. *Proc Natl Acad Sci U S A* 115: E9570-E9579

510

511 **Figure Legends**

512

513 **Figure 1.**

514 FCHSD2 regulates TfnR and EGFR endocytic trafficking in NSCLC cells. **A**, The knockdown of  
515 FCHSD2 in control or FCHSD2 siRNA-treated HCC4017 cells. **B** and **C**, Endocytic recycling of  
516 TfnR (**B**) or EGFR (**C**) was measured in control or FCHSD2 siRNA-treated HCC4017 cells.  
517 Cells were pulsed for 10 min or 30 min with 10 µg/ml biotinylated Tfn (**B**) or 20 ng/ml  
518 biotinylated EGF (**C**), stripped, and reincubated at 37°C for the indicated times before measuring  
519 the remaining intracellular Tfn or EGF. Percentage of recycled biotinylated Tfn or EGF was  
520 calculated relative to the initial loading. Data represent mean ± SEM ( $n = 3$ ). Two-tailed  
521 Student's *t* tests were used to assess statistical significance versus siCtrl. \* $P < 0.05$ , \*\* $P < 0.005$ ,  
522 \*\*\* $P < 0.0005$ . **D**, Representative confocal images of pEGFR and LAMP1 immunofluorescence  
523 staining in control or FCHSD2 siRNA-treated HCC4017 cells. Cells were incubated with 20  
524 ng/ml EGF for 30 min at 4°C, washed, and reincubated at 37°C for the indicated times. Scale bar,  
525 12.5 µm. **E**, Colocalization of pEGFR and LAMP1 immunofluorescence staining in the cells as  
526 described in **D**. Data were obtained from at least 40 cells in total/condition and represent mean ±  
527 SEM. Two-tailed Student's *t* tests were used to assess statistical significance. n.s., not significant,  
528 \* $P < 0.05$ . **F**, HCC4017 control or FCHSD2 siRNA-treated cells were stimulated with EGF (100  
529 ng/ml) in the presence of cycloheximide (40 µg/ml) and incubated for the indicated times at  
530 37°C. **G**, Quantification of EGFR/ERK intensity ratios in the cells as described in **F**. Percentage  
531 of degraded EGFR was calculated relative to the initial amount. Data represent mean ± SEM ( $n =$   
532 3). Two-tailed Student's *t* tests were used to assess statistical significance. \* $P < 0.05$ .

533

534

535 **Figure 2.**

536 FCHSD2 depletion alters the trafficking of MET receptor. **A**, Quantification of the colocalization  
537 of MET with EEA1, Rab11 or LAMP1 immunofluorescence staining in control or FCHSD2  
538 siRNA-treated HCC4017 cells. Cells were incubated with 1  $\mu\text{g/ml}$  HGF for 30 min at 4°C,  
539 washed, and reincubated at 37°C for the indicated times. Data were obtained from at least 40  
540 cells in total/condition and represent mean  $\pm$  SEM. Two-tailed Student's *t* tests were used to  
541 assess statistical significance. n.s., not significant, \**P* < 0.05, \*\**P* < 0.005, \*\*\**P* < 0.0005,  
542 \*\*\*\**P* < 0.00005. Representative confocal images are shown in EV Fig. 3 and 4. **B**, HCC4017  
543 control or FCHSD2 siRNA-treated cells were stimulated with HGF (100 ng/ml) in the presence  
544 of cycloheximide (40  $\mu\text{g/ml}$ ) and incubated at 37°C for the indicated times. **C**, Quantification of  
545 MET/ERK intensity ratios in the cells as described in **B**. Percentage of degraded MET was  
546 calculated relative to the initial amount. Data represent mean  $\pm$  SEM (*n* = 3). Two-tailed  
547 Student's *t* tests were used to assess statistical significance. \*\**P* < 0.005, \*\*\**P* < 0.0005.

548

549 **Figure 3.**

550 FCHSD2 depletion-induced upregulation of the RTKs is independent of their activities. **A**,  
551 FCHSD2 knockdown increases the transcription of *EGFR* and *MET* mRNA. All data were  
552 normalized to siCtrl and represent mean  $\pm$  SEM (*n* = 3). Two-tailed Student's *t* tests were used to  
553 assess statistical significance. \**P* < 0.05, \*\*\*\**P* < 0.00005. **B**, HCC4017 control or FCHSD2  
554 siRNA-treated cells were incubated with EGFR inhibitor (Afatinib) or MET inhibitor (Crizotinib)  
555 at the indicated concentration for 24 h. **C**, Quantification of EGFR/ERK or MET/ERK intensity  
556 ratios in the cells as described in **B**. All data were normalized to siCtrl and represent mean  $\pm$   
557 SEM (*n* = 3). Two-tailed Student's *t* tests were used to assess statistical significance. \**P* < 0.05,



558 \*\* $P < 0.005$ , \*\*\*\* $P < 0.00005$ . **D**, Knockdown of FCHSD2 did not enhance translocation of  
559 phospho-STAT3 into the nucleus. Cell lysates from control or FCHSD2 siRNA-treated  
560 HCC4017 cells were subjected to fractionation. N, nuclear fraction. C, cytoplasmic fraction. **E**,  
561 Loss of FCHSD2 did not increase the transcription of phospho-STAT3 target genes, *HGF* and *c-*  
562 *Fos*. All data were normalized to siCtrl and represent mean  $\pm$  SEM ( $n = 3$ ). Two-tailed Student's  
563 *t* tests were used to assess statistical significance. n.s., not significant.

564

565 **Figure 4.**

566 ERK1/2 activity is essential for the RTK upregulation induced by FCHSD2 depletion. **A**, Loss of  
567 FCHSD2 enhances ERK1/2 activity and c-Jun expression, but not Akt activity in HCC4017 cells.  
568 **B**, Quantification of signaling activities in the cells as described in **A**. All data were normalized  
569 to siCtrl and represent mean  $\pm$  SEM ( $n = 3$ ). Two-tailed Student's *t* tests were used to assess  
570 statistical significance. n.s., not significant, \* $P < 0.05$ . **C**, Knockdown of FCHSD2 increases c-  
571 Jun protein expression and mRNA transcription. The protein expression was determined by  
572 quantification of c-Jun/Vinculin intensity ratios in the cells as described in **A**. All data were  
573 normalized to siCtrl and represent mean  $\pm$  SEM ( $n = 3$ ). Two-tailed Student's *t* tests were used to  
574 assess statistical significance. \* $P < 0.05$ , \*\*\* $P < 0.0005$ . **D**, Knockdown of FCHSD2 specifically  
575 enhances nuclear p-ERK1/2, p-ETS1 and c-Jun levels in HCC4017 cells. Cell lysates from  
576 control or FCHSD2 siRNA-treated HCC4017 cells were subjected to fractionation. N, nuclear  
577 fraction. C, cytoplasmic fraction. **E**, Quantification of p-ERK/ERK and p-ETS1/ETS1 intensity  
578 ratios in the cells as described in **D**. All data were normalized to siCtrl and represent mean  $\pm$   
579 SEM ( $n = 3$ ). Two-tailed Student's *t* tests were used to assess statistical significance. n.s., not  
580 significant, \* $P < 0.05$ . **F**, ERK or MEK inhibition disrupts the RTK upregulation induced by

581 FCHSD2 knockdown. ERK1/2 inhibitor (SCH772984, 1  $\mu$ M) or MEK1/2 inhibitor  
582 (GSK1120212, 1  $\mu$ M) was used to treat control or FCHSD2 siRNA-treated HCC4017 or H1975  
583 cells for 72 h. **G**, Quantification of EGFR/ERK or MET/ERK intensity ratios in the cells as  
584 described in **F**. All data were normalized to siCtrl and represent mean  $\pm$  SEM ( $n = 3$ ). Two-tailed  
585 Student's  $t$  tests were used to assess statistical significance. n.s., not significant,  $*P < 0.05$ .

586  
587 **Figure 5.**

588 Rab7 is required for FCHSD2 depletion-induced upregulation of the RTKs. **A**, Endocytic  
589 recycling of TfnR or EGFR was measured in control, Rab7, FCHSD2 or both siRNA-treated  
590 HCC4017 cells. Cells were pulsed for 30 min with 10  $\mu$ g/ml biotinylated Tfn or 20 ng/ml  
591 biotinylated EGF, stripped, and reincubated at 37°C for the indicated times before measuring the  
592 remaining intracellular Tfn or EGF. Percentage of recycled biotinylated Tfn or EGF was  
593 calculated relative to the initial loading. Data represent mean  $\pm$  SEM ( $n = 3$ ). Two-tailed  
594 Student's  $t$  tests were used to assess statistical significance versus siCtrl.  $*P < 0.05$ ,  $***P <$   
595  $0.0005$ . **B**, Rab7 knockdown abolishes the RTK upregulation induced by FCHSD2 depletion.  
596 Quantification of EGFR/ERK or MET/ERK intensity ratios in the cells was measured. All data  
597 were normalized to siCtrl and represent mean  $\pm$  SEM ( $n = 3$ ). Two-tailed Student's  $t$  tests were  
598 used to assess statistical significance. n.s., not significant,  $*P < 0.05$ . **C**, FCHSD2 depletion  
599 promotes the activity of Rab7. Cell lysates from control or FCHSD2 siRNA-treated HCC4017  
600 cells were immunoprecipitated with anti-Rab7-GTP (active form of Rab7) antibody. The  
601 indicated proteins were detected. Quantification of Rab7-GTP/input Rab7 intensity ratios in the  
602 cells was measured. All data were normalized to siCtrl and represent mean  $\pm$  SEM ( $n = 3$ ). Two-  
603 tailed Student's  $t$  tests were used to assess statistical significance.  $*P < 0.05$ .

604

605 **Figure 6.**

606 FCHSD2 and Rab7 reciprocally regulate endocytic trafficking and lung cancer progression. **A,**  
607 FCHSD2 regulates multiple steps in endocytic trafficking. We previously showed that activation  
608 of FCHSD2 downstream of ERK1/2 increases the rate of clathrin-coated pits (CCP) initiation  
609 and CME in NSCLC cells. Here we report that FCHSD2 also increases the rate of RTK  
610 trafficking from early endosomes (EE) to recycling endosomes (RE) and negatively regulates  
611 Rab7 activity, maturation of late endosomes/multivesicular bodies (LE/MVB) and trafficking to  
612 lysosomes (Lys). Together these activities of FCHSD2 increase the flux of RTKs through early  
613 endocytic pathways and thus altering their downstream signaling. Loss of FCHSD2 results in the  
614 accumulation of RTKs in late endosomes/lysosomes, increases levels of activated ERK1/2 in the  
615 nucleus and enhances transcription and expression of c-Jun, EGFR and MET. **B,**  
616 Immunohistochemistry images and quantification (expressed as H-score) of FCSHD2 staining in  
617 representative lung tumor tissues. Scale bar, 100  $\mu$ m. **C,** Kaplan-Meier survival analysis of  
618 NSCLC or lung adenocarcinoma patients was performed in FCHSD2 or Rab7 high- and low-  
619 expression cohorts.

620

621 **Expanded View Figure Legends**

622

623

624 **EV Figure 1.**

625 The effects of FCHSD2 depletion and ERK1/2 inhibition in TfnR endocytic recycling. Endocytic  
626 recycling of TfnR was measured in control or FCHSD2 siRNA-treated HCC4017 and ARPE-19  
627 cells in the absence or presence of the ERK1/2 inhibitor SCH772984 (10  $\mu$ M). Cells were pulsed  
628 for 30 min with 10  $\mu$ g/ml biotinylated Tfn, stripped, and reincubated at 37°C for the indicated  
629 times before measuring the remaining intracellular Tfn. Percentage of recycled biotinylated Tfn

630 was calculated relative to the initial loading. Data represent mean  $\pm$  SEM ( $n = 3$ ). Two-tailed  
631 Student's *t* tests were used to assess statistical significance versus siCtrl. \**P* < 0.05, \*\**P* < 0.005.

632  
633 **EV Figure 2.**

634 FCHSD2 regulates EGFR endocytic trafficking in H1975 cells. **A**, The knockdown of FCHSD2  
635 in control or FCHSD2 siRNA-treated H1975 cells. **B**, Endocytic recycling of EGFR was  
636 measured in control or FCHSD2 siRNA-treated H1975 cells. Cells were pulsed for 10 min or 30  
637 min with 20 ng/ml biotinylated EGF, stripped, and reincubated at 37°C for the indicated times  
638 before measuring the remaining intracellular EGF. Percentage of recycled EGF was calculated  
639 relative to the initial loading. Data represent mean  $\pm$  SEM ( $n = 3$ ). Two-tailed Student's *t* tests  
640 were used to assess statistical significance. \**P* < 0.05, \*\**P* < 0.005, \*\*\**P* < 0.0005. **C**,  
641 Representative confocal images of pEGFR and LAMP1 immunofluorescence staining in control  
642 or FCHSD2 siRNA-treated H1975 cells. Cells were incubated with 20 ng/ml EGF for 30 min at  
643 4°C, washed, and reincubated at 37°C for the indicated times. Scale bar, 12.5  $\mu$ m. **D**,  
644 Colocalization of pEGFR and LAMP1 immunofluorescence staining in the cells as described in  
645 **C**. Data were obtained from at least 40 cells in total/condition and represent mean  $\pm$  SEM. Two-  
646 tailed Student's *t* tests were used to assess statistical significance. \**P* < 0.05.

647  
648 **EV Figure 3**

649 Representative confocal images of MET, EEA1 and Rab11 immunofluorescence staining in  
650 control or FCHSD2 siRNA-treated HCC4017 cells. Cells were incubated with 1  $\mu$ g/ml HGF for  
651 30 min at 4°C, washed, and reincubated at 37°C for the indicated times. Scale bar, 25  $\mu$ m.  
652 Quantified results are shown in Fig. 2A.

654

655 **EV Figure 4.**

656 Representative confocal images of MET, EEA1 and LAMP1 immunofluorescence staining in  
657 control or FCHSD2 siRNA-treated HCC4017 cells. Cells were incubated with 1 µg/ml HGF for  
658 30 min at 4°C, washed, and re-incubated at 37°C for the indicated times. Scale bar, 25 µm.  
659 Quantified results are shown in Fig. 2A.

660

661 **EV Figure 5.**

662 FCHSD2 depletion-induced upregulation of the RTKs is independent of their activities. H1975  
663 control or FCHSD2 siRNA-treated cells were incubated with EGFR inhibitor (Afatinib) or MET  
664 inhibitor (Crizotinib) as indicated concentration for 24 h.

665

666

667

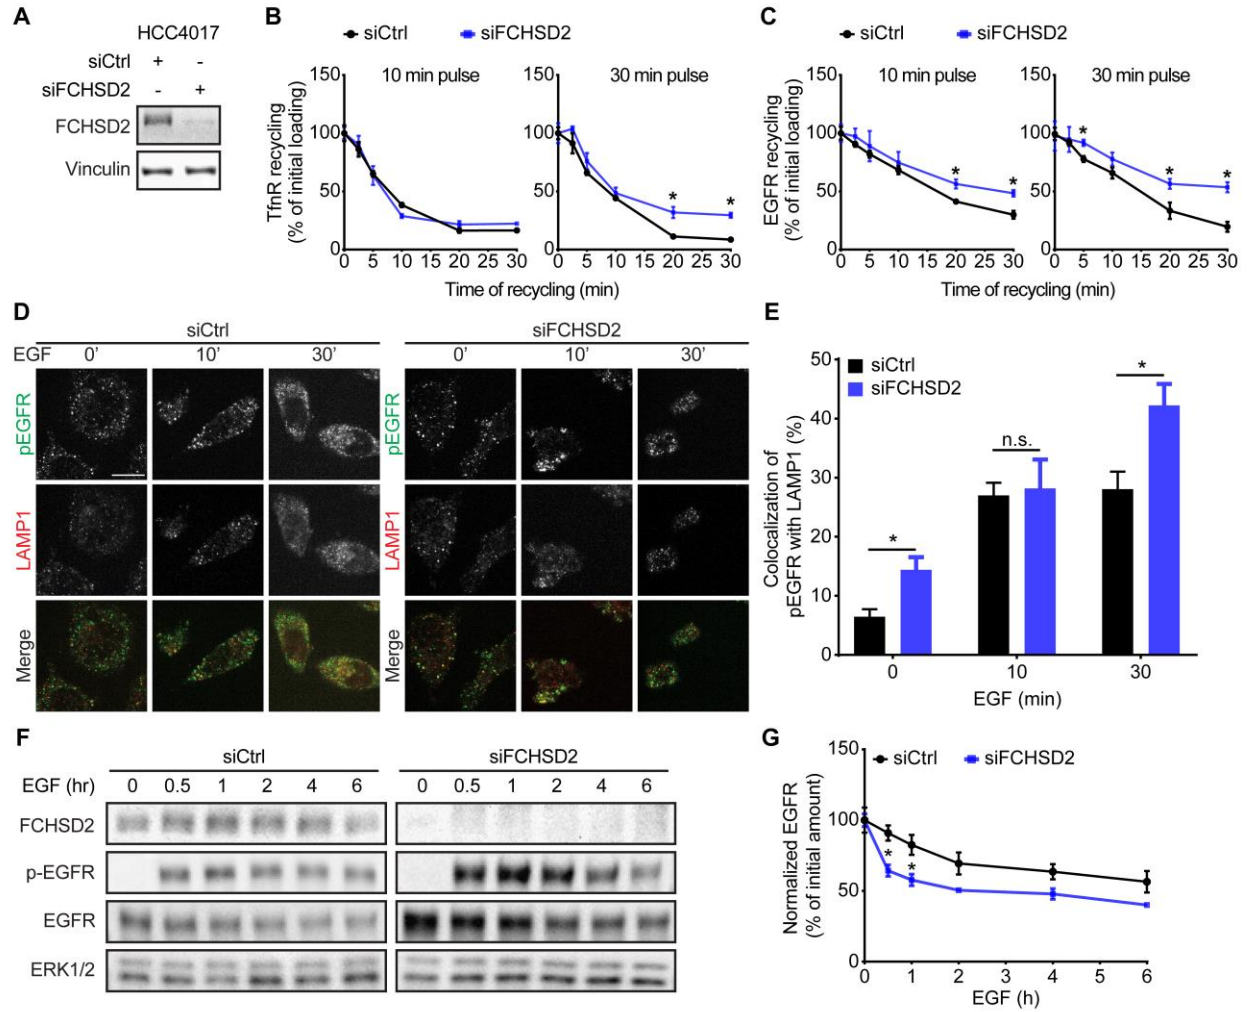

Figure 1

668

669

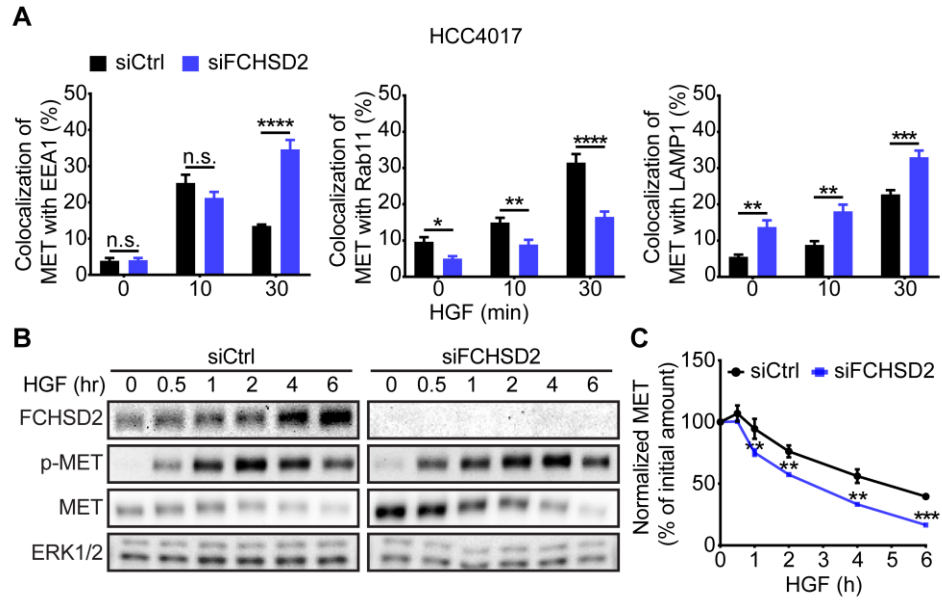

Figure 2

670

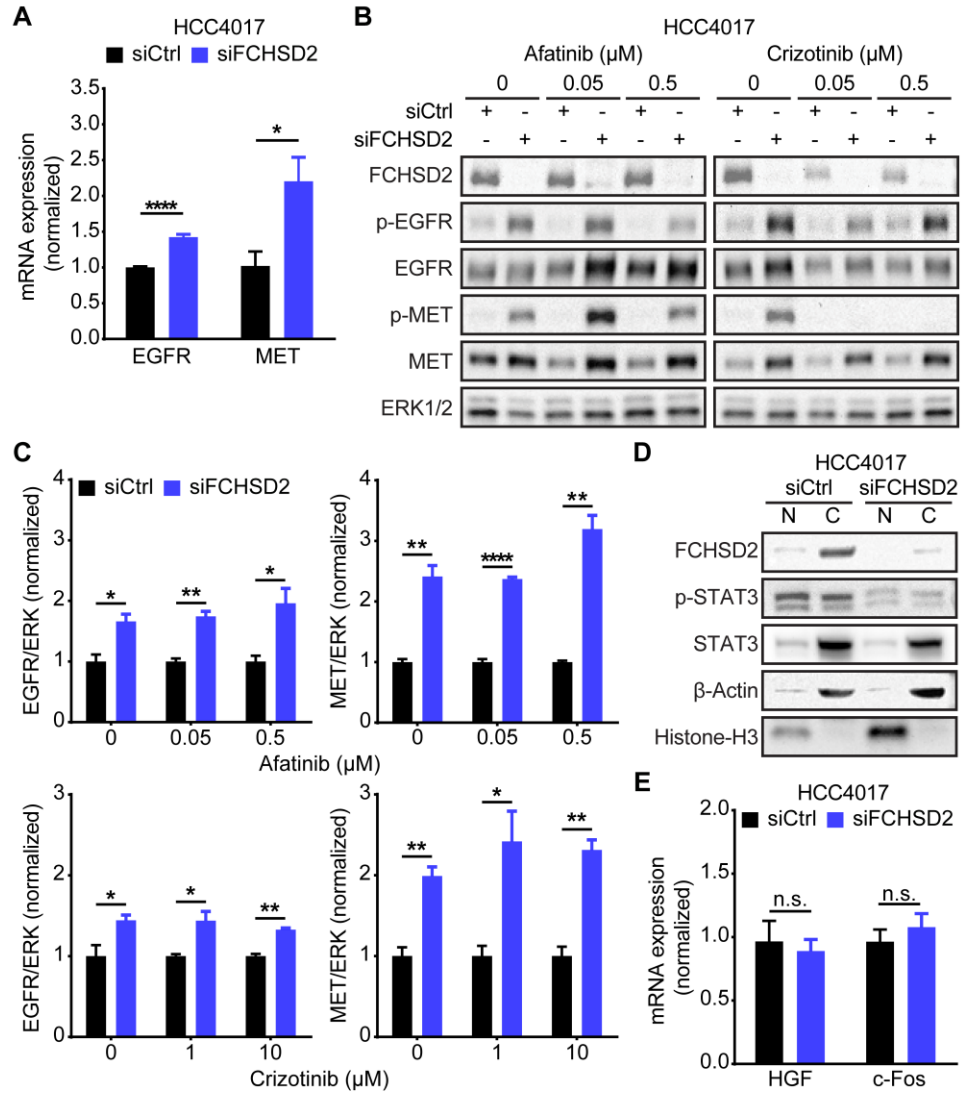

Figure 3

671

672

673



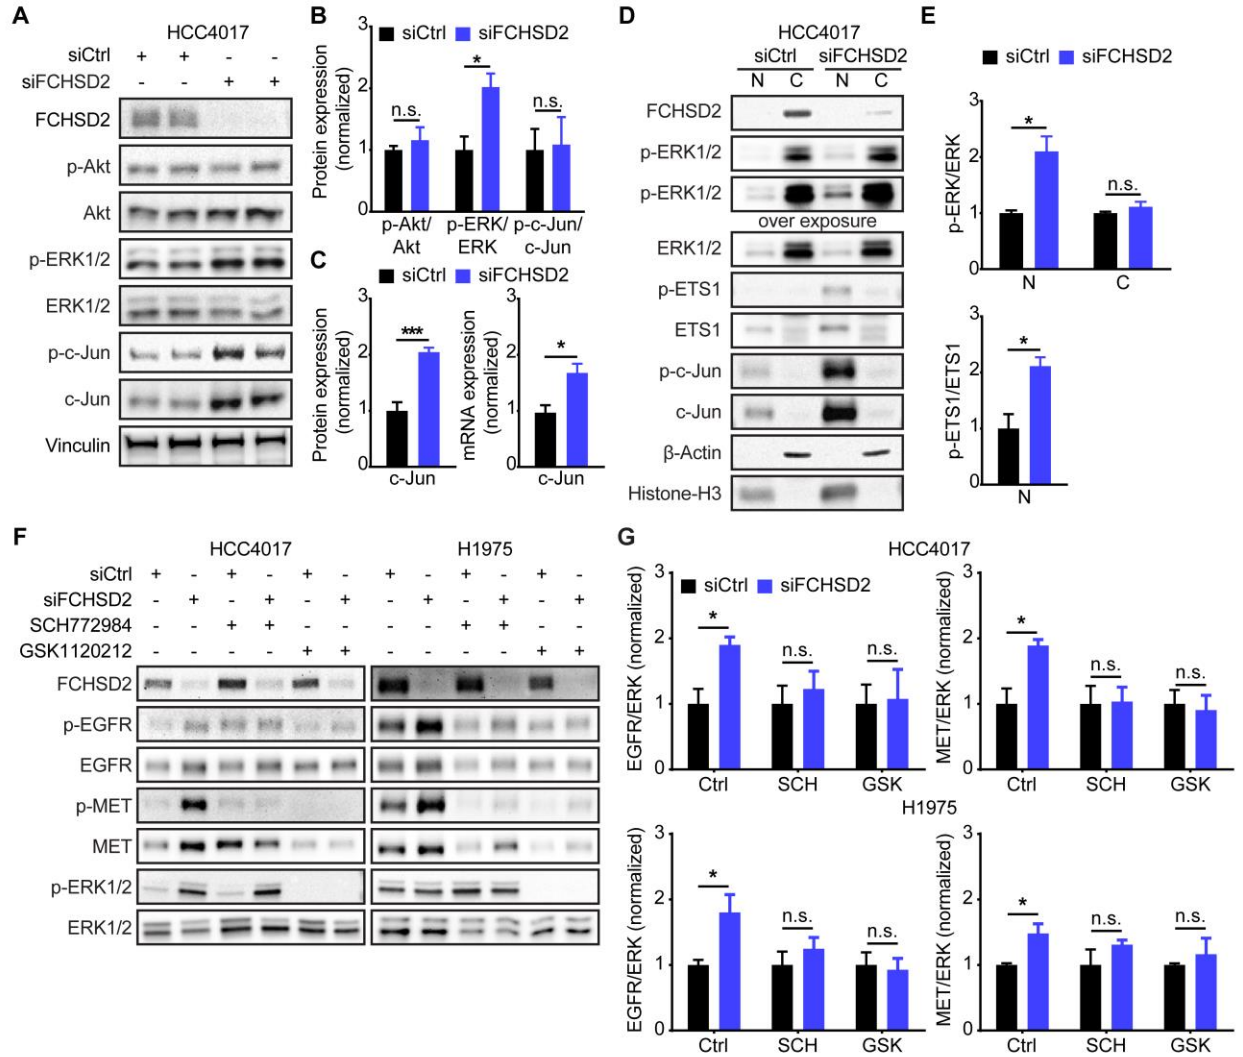

Figure 4

674

675

676

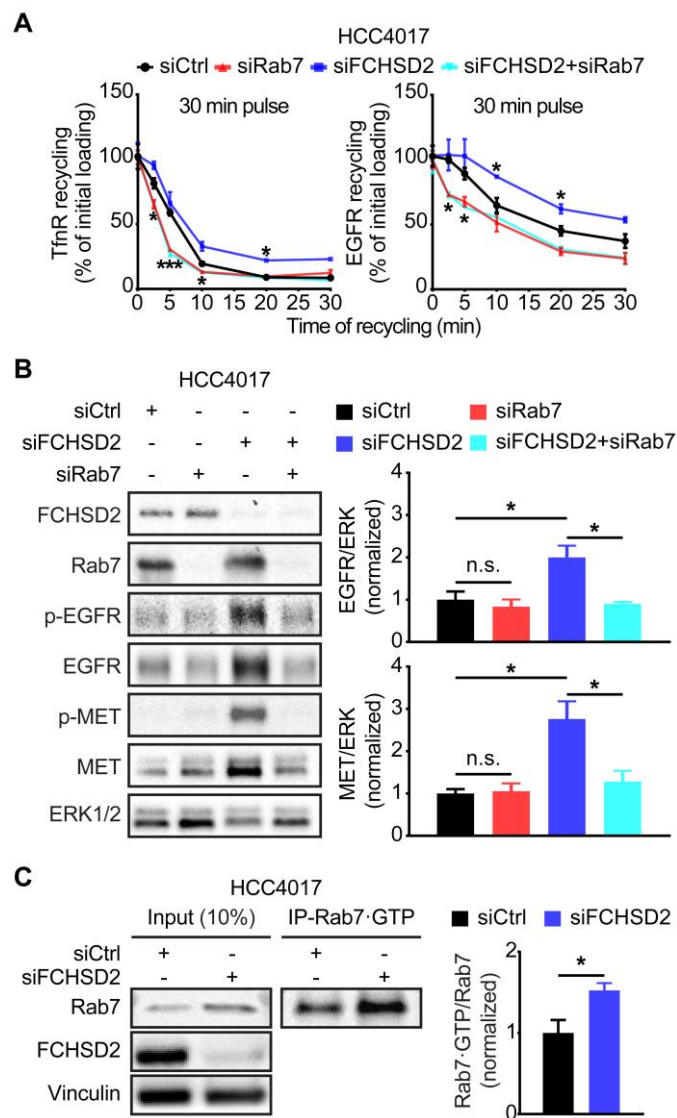

Figure 5

677

678

679

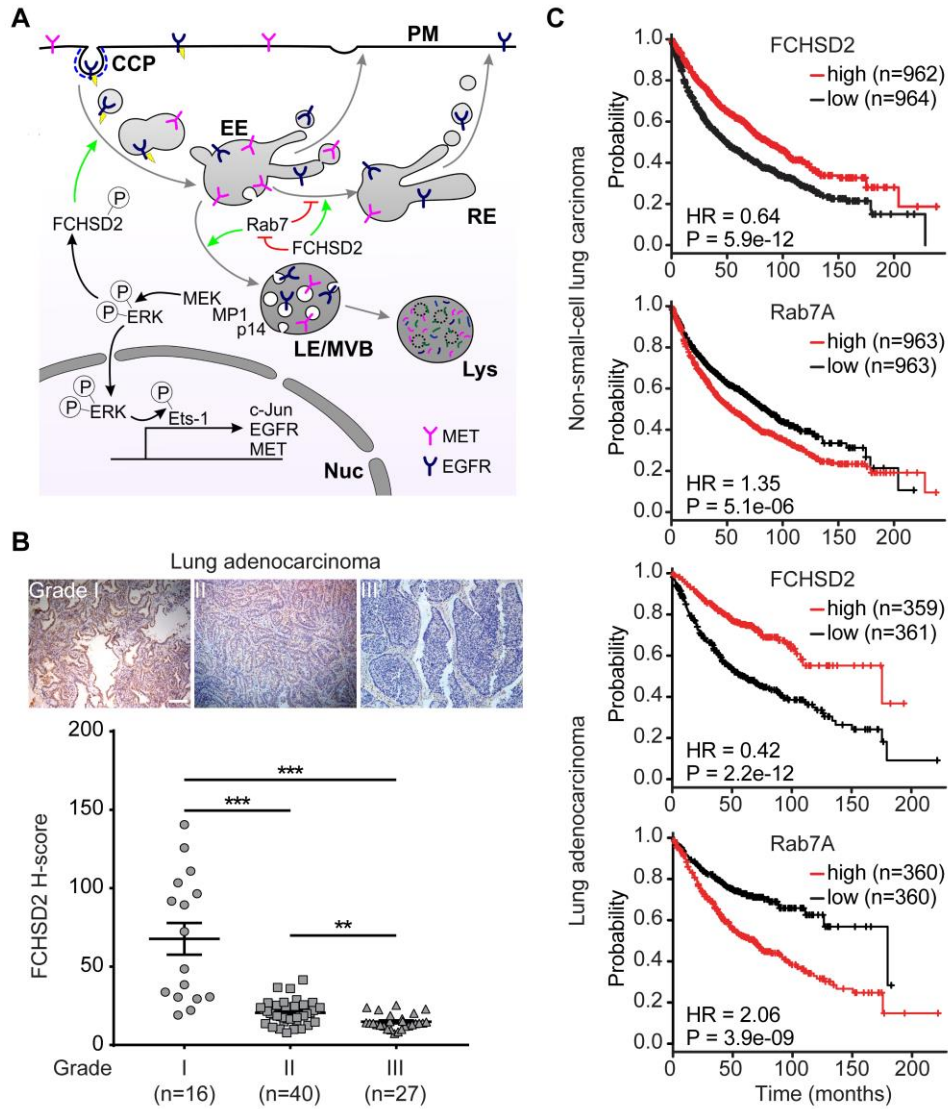

Figure 6

680

681

682

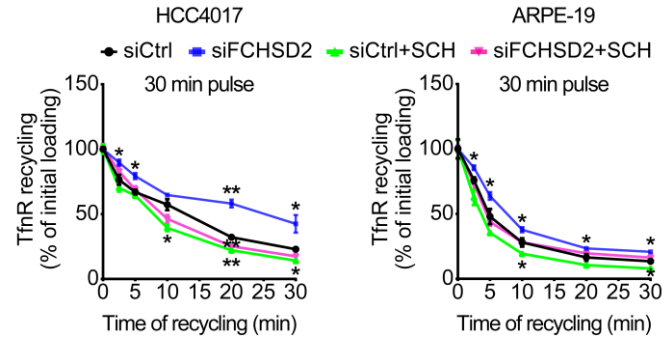

683

684

685 **Expanded View Figure 1**

686

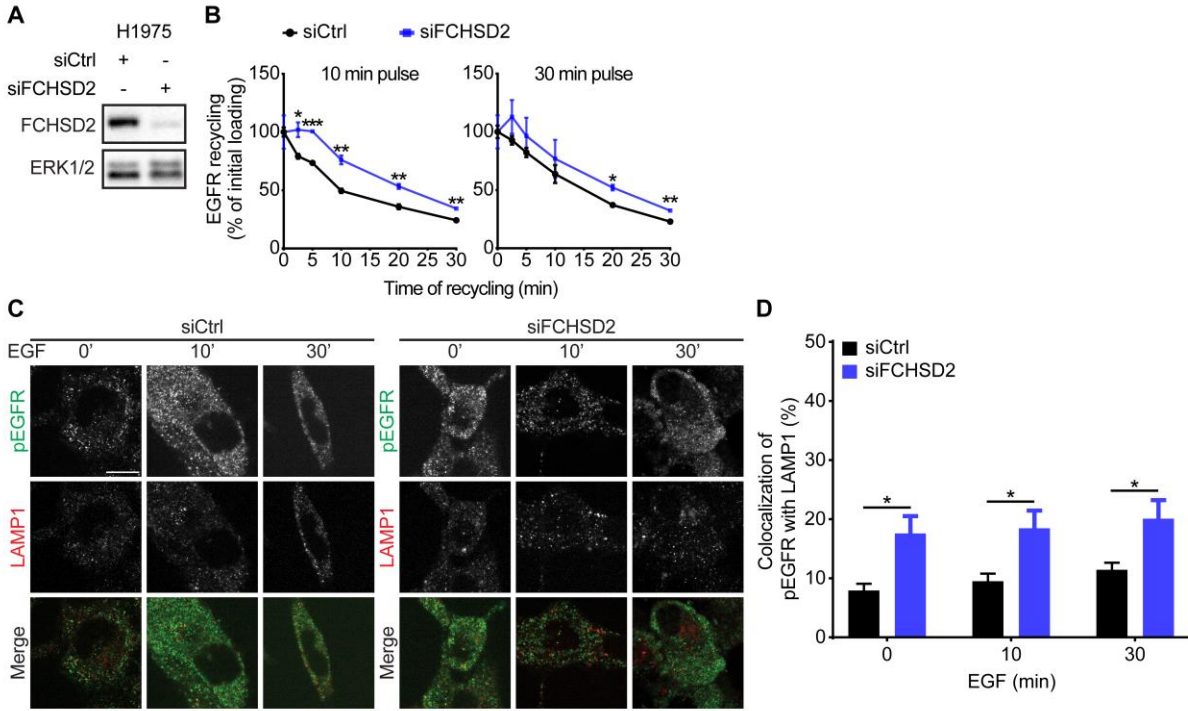

687

688

689 **Expanded View Figure 2**

690

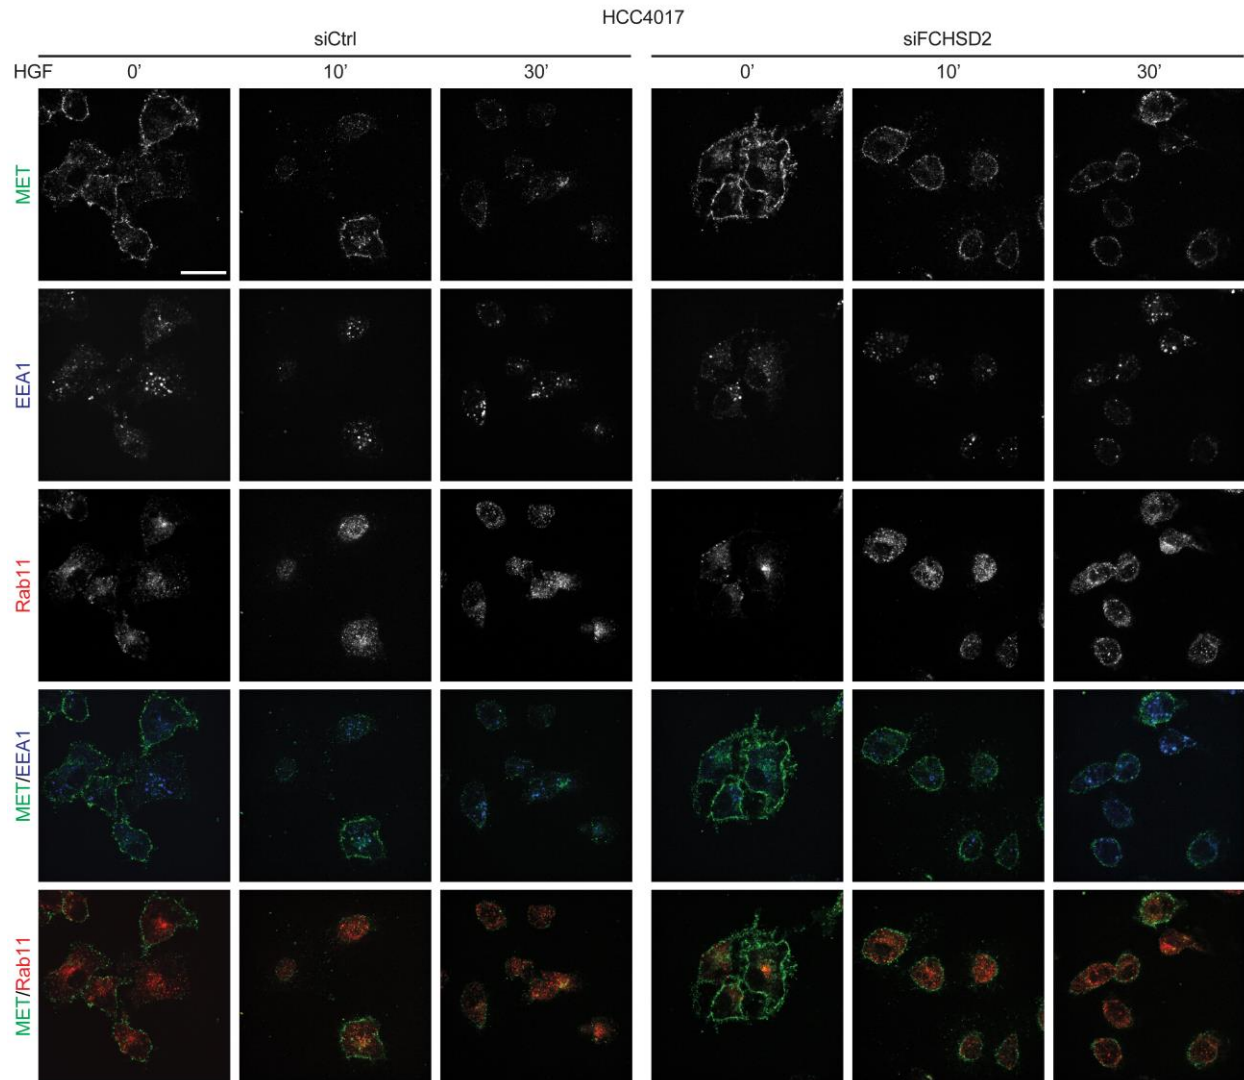

691

692

693 **Expanded View Figure 3**

694

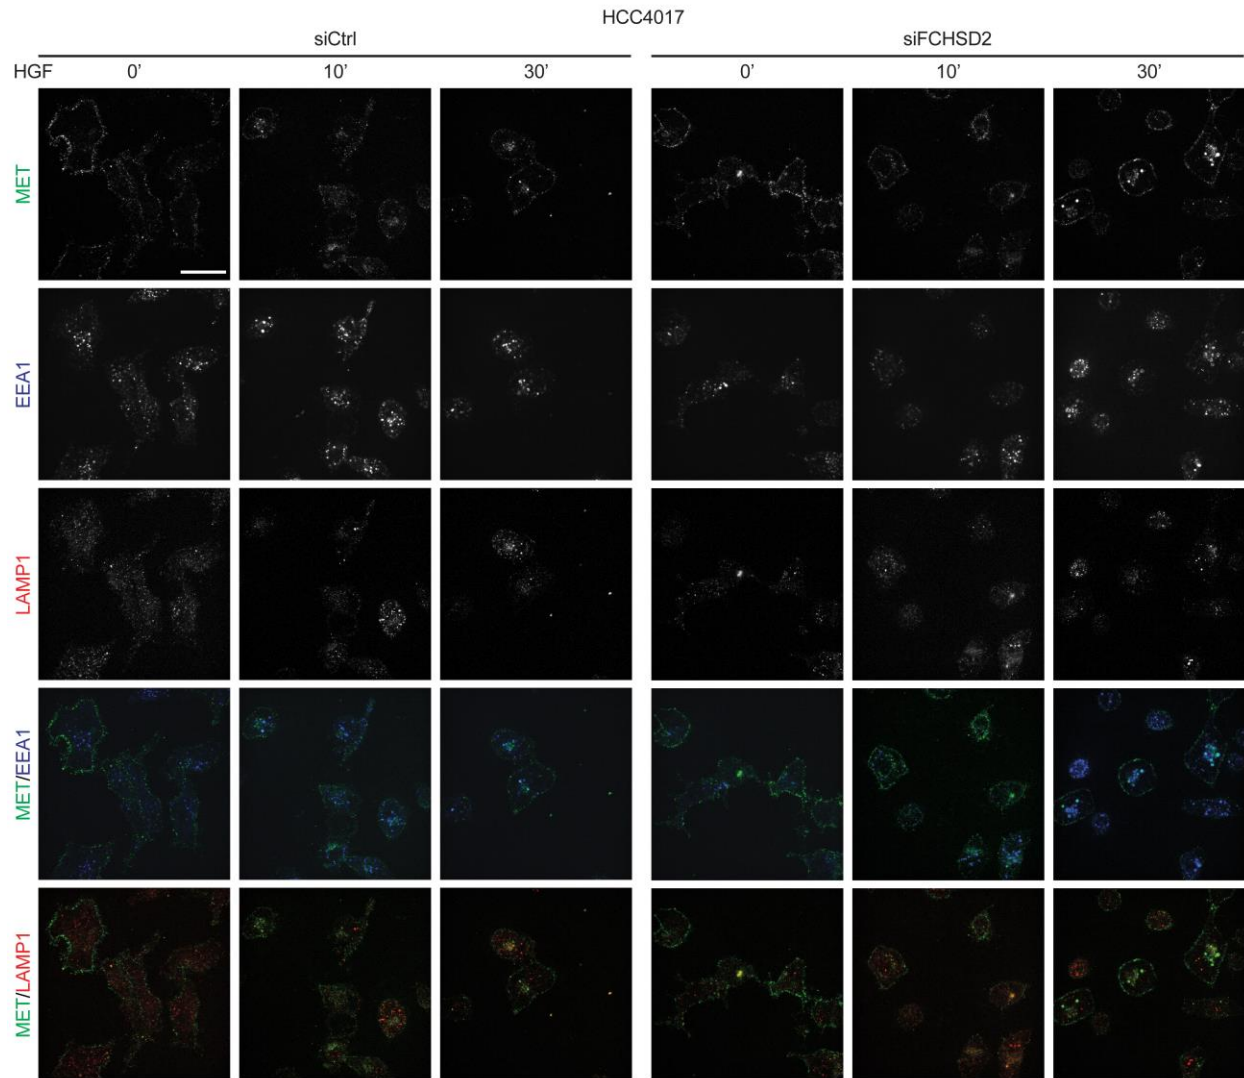

695

696

697 **Expanded View Figure 4**

698

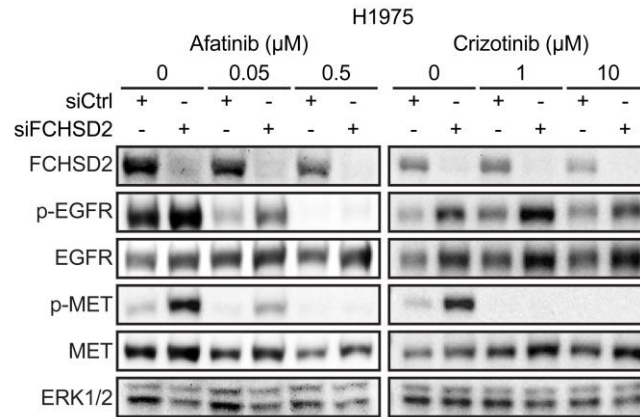

699

700 **Expanded View Figure 5**

701
